# Supplementary material for: Sex-Dependent Effects of Piromelatine Treatment on Sleep-Wake Cycle and Sleep Structure of Prenatally Stressed Rats
Source: MDPI journal article supplement (doi:10.3390/ijms231810349), 2022-09-08
Supplement: s1 [file s1]

## Supplementary

**Table S1** Cosinor analysis of 24-h home-cage motor activity of male rats with piromelatine treatment and postnatal stress. The differences were analysed by multiple t-tests corrected using the Holm-Sidak method.

| Group   | Mesor  | Amplitude | Acrophase |
|---------|--------|-----------|-----------|
| C-veh   | 116.46 | 83.12     | 16.83     |
| C-Pir   | 101.42 | 70.50     | 17.91     |
| PNS-veh | 201.19 | 107.70    | 18.25     |
| PNS-Pir | 153.43 | 75.79     | 16.76     |

**Table S2** Cosinor analysis of 24-h home-cage motor activity of female rats with piromelatine treatment and postnatal stress. The differences were analysed by multiple t-tests corrected using the Holm-Sidak method.

| Group   | Mesor  | Amplitude | Acrophase |
|---------|--------|-----------|-----------|
| C-veh   | 187.93 | 78.80     | 16.23     |
| C-Pir   | 166.40 | 99.14     | 16.60     |
| PNS-veh | 255.75 | 184.70    | 17.83     |
| PNS-Pir | 197.41 | 77.45     | 15.86     |

**Table S3** Cosinor analysis of 24-h Wake activity detected by EEG recording of male rats with piromelatine treatment and postnatal stress. The differences were analysed by multiple t-tests corrected using the Holm-Sidak method.

| Group       | Mesor   | Amplitude | Acrophase |
|-------------|---------|-----------|-----------|
| C-veh       | 1577.73 | 539.36    | 15.14     |
| C-Pir       | 1644.71 | 786.17    | 16.79     |
| C-Pir-Luz   | 1886.34 | 321.09    | 15.73     |
| PNS-veh     | 2289.38 | 257.99    | 8.72      |
| PNS-Pir     | 1723.69 | 683.08    | 16.34     |
| PNS-Pir-Luz | 2054.83 | 206.23    | 8.82      |

**Table S4** Cosinor analysis of 24-h Wake activity detected by EEG recording of female rats with piromelatine treatment and postnatal stress. The differences were analysed by multiple t-tests corrected using the Holm-Sidak method.

| Group       | Mesor   | Amplitude | Acrophase |
|-------------|---------|-----------|-----------|
| C-veh       | 1474.70 | 464.39    | 16.67     |
| C-Pir       | 1401.75 | 404.74    | 13.59     |
| C-Pir-Luz   | 1774.65 | 293.03    | 15.80     |
| PNS-veh     | 2341.39 | 280.33    | 14.52     |
| PNS-Pir     | 1244.24 | 340.75    | 16.70     |
| PNS-Pir-Luz | 1996.89 | 441.20    | 12.68     |

**Table S5** Cosinor analysis of 24-h NREM activity detected by EEG recording of male rats with piromelatine treatment and postnatal stress. The differences were analysed by multiple t-tests corrected using the Holm-Sidak method.

| Group | Mesor | Amplitude | Acrophase |
|-------|-------|-----------|-----------|
|-------|-------|-----------|-----------|

|             |         |        |       |
|-------------|---------|--------|-------|
| C-veh       | 1816.05 | 905.72 | 4.16  |
| C-Pir       | 1952.51 | 804.74 | 5.38  |
| C-Pir-Luz   | 1572.33 | 357.22 | 11.28 |
| PNS-veh     | 1483.82 | 411.21 | 4.03  |
| PNS-Pir     | 2160.16 | 426.27 | 5.44  |
| PNS-Pir-Luz | 1259.14 | 141.50 | 0.17  |

**Table S6** Cosinor analysis of 24-h NREM activity detected by EEG recording of female rats with piromelatine treatment and postnatal stress. The differences were analysed by multiple t-tests corrected using the Holm-Sidak method.

| Group       | Mesor   | Amplitude | Acrophase |
|-------------|---------|-----------|-----------|
| C-veh       | 2090.03 | 685.28    | 5.60      |
| C-Pir       | 2034.23 | 875.88    | 4.43      |
| C-Pir-Luz   | 1572.32 | 357.26    | 11.29     |
| PNS-veh     | 1383.11 | 211.35    | 3.69      |
| PNS-Pir     | 2227.53 | 397.44    | 4.12      |
| PNS-Pir-Luz | 203.68  | 192.02    | 10.22     |

**Table S7** Cosinor analysis of 24-h REM activity detected by EEG recording of male rats with piromelatine treatment and postnatal stress. The differences were analysed by multiple t-tests corrected using the Holm-Sidak method.

| Group       | Mesor   | Amplitude | Acrophase |
|-------------|---------|-----------|-----------|
| C-veh       | 1474.70 | 464.39    | 16.67     |
| C-Pir       | 335.74  | 208.23    | 7.62      |
| C-Pir-Luz   | 106.91  | 10.49     | 3.38      |
| PNS-veh     | 278.02  | 206.72    | 6.84      |
| PNS-Pir     | 155.05  | 118.42    | 8.35      |
| PNS-Pir-Luz | 155.04  | 118.42    | 8.34      |

**Table S8** Cosinor analysis of 24-h REM activity detected by EEG recording of female rats with piromelatine treatment and postnatal stress. The differences were analysed by multiple t-tests corrected using the Holm-Sidak method.

| Group       | Mesor   | Amplitude | Acrophase |
|-------------|---------|-----------|-----------|
| C-veh       | 418.09  | 281.93    | 5.26      |
| C-Pir       | 335.74  | 208.03    | 7.68      |
| C-Pir-Luz   | 414.26  | 131.23    | 13.70     |
| PNS-veh     | 1825.70 | 1026.90   | 0.45      |
| PNS-Pir     | 263.35  | 30.14     | 17.04     |
| PNS-Pir-Luz | 650.09  | 19.17     | 19.43     |
